# Supplementary material for: County-level estimates of suicide mortality in the USA: a modelling study
Source: PubMed Central journal article supplement — Lancet Public Health. Author manuscript; Available in PMC 2023 Mar 7. (PMC9990589; doi:10.1016/s2468-2667(22)00290-0), 2023-01-23
Supplement: NIHMS1877536-supplement-1.pdf [file NIHMS1877536-supplement-1.pdf]

# THE LANCET

## Public Health

### **Supplementary appendix**

This appendix formed part of the original submission and has been peer reviewed. We post it as supplied by the authors.

Supplement to: Kandula S, Martinez-Alés G, Rutherford C, et al. County-level estimates of suicide mortality in the USA: a modelling study. *Lancet Public Health* 2023; published online Jan 23. [https://doi.org/10.1016/S2468-2667\(22\)00290-0](https://doi.org/10.1016/S2468-2667(22)00290-0).

Supplementary Text for

**Suicide mortality in US counties: a modeling study**

Sasikiran Kandula, MS\*<sup>1</sup>, Gonzalo Martinez-Alés, PhD<sup>2-5</sup>, Caroline Rutherford, MS<sup>2</sup>, Catherine Gimbrone, MPH<sup>2</sup>, Mark Olfson, MD<sup>2,6,†</sup>, Madelyn S. Gould, PhD<sup>2,6,†</sup>, Katherine M. Keyes, PhD<sup>2,†</sup>, Jeffrey Shaman, PhD<sup>1,†</sup>

<sup>1</sup> Department of Environmental Health Sciences, Columbia University, New York, NY. 10032.

<sup>2</sup> Department of Epidemiology, Columbia University, New York, NY. 10032.

<sup>3</sup> CAUSALab, Harvard T.H. Chan School of Public Health, Boston, MA. 02115.

<sup>4</sup> Mental Health Network Biomedical Research Center (CIBERSAM), Madrid, Spain

<sup>5</sup> Mental Health Research Group, Hospital La Paz Institute for Health Research (IdiPAZ), Madrid, Spain

<sup>6</sup> Department of Psychiatry, Columbia University, New York, NY. 10032.

† denotes appointments as Full Professor

*\*Corresponding author:*

S. Kandula  
722 West 168<sup>th</sup> Street, 1104,  
Environmental Health Sciences/MSPH,  
New York, NY. 10032.  
[sk3542@cumc.columbia.edu](mailto:sk3542@cumc.columbia.edu)

**Keywords:** mental health; suicide; public health surveillance; socioeconomic determinants; spatiotemporal models;

2 **Contents**

3 **Text**

- 4 1. Detailed description of independent variables
- 5 2. Conditional Autoregressive (CAR) Models
- 6 3. Reference Model
- 7 4. Variable selection for the CAR model
- 8 5. Isolated counties and counties with no recorded deaths
- 9 6. CAR model with county-level covariates
- 10 7. Sensitivity analysis of Inverse-Gamma shape and scale hyperparameters

11 **Tables**

- 12 1. Effect estimates for suicide mortality risk per standard deviation change in predictor
- 13 2. Effect estimates for suicide mortality risk per *unit change* in predictor
- 14 3. Output from the *select* model over the fit period with mean and 95% credible interval

14 **Figure**

- 15 1. Pearson and Spearman correlation coefficient for variables used
- 16 2. Temporal trend and heterogeneity in suicide risk per three CAR models
- 17 3. Mean and Median symmetric proportional error for in-sample, temporal out-of-sample
- 18 and spatial out-of-sample estimates for the three CAR models
- 19 4. Trace plots for the intercept and regression parameters in the *select* model
- 20 5. Scatter plot of model estimates of suicide deaths from *select* model in temporal OOS
- 21 setting
- 22 6. Global Moran' I in the residual
- 23 7. Mean and Median symmetric proportional error for in-sample, temporal out-of-sample
- 24 and spatial out-of-sample estimates, with zero-count county-year instances excluded.

25

26 ***Appendix Text 1: Detailed description of independent variables***

27 *Proportion of population living in poverty; median household Income*

28 US Census Bureau's Small Area Income and Poverty Estimates (SAIPE) program(1) provides annual  
29 estimates of measures of income and poverty at small geographical resolutions (county and school  
30 district), which are either unavailable or only available infrequently. For example, the 1-year  
31 American Community Survey (ACS) provides data on persons living in poverty only for counties with  
32 a population greater than 65000. SAIPE uses a regression model to estimate poverty rates in all  
33 counties with the number of persons in poverty as the dependent variable (in counties where ACS  
34 survey estimates are available) and multiple predictor variables from the Supplemental Nutrition  
35 Assistance Program (SNAP), federal income tax returns and US Decennial census. Estimates of  
36 median household income are similarly obtained from a separate regression model with additional  
37 predictor variables provided by the Bureau of Economic Analysis.

38 *Prevalence of major depressive episodes*

39 The National Surveys on Drug Use and Health (NSDUH) dataset contains state-level small area  
40 estimates on key substance use and mental health outcomes(2). The depression prevalence indicator  
41 is the estimated proportion of population with at least one major depressive episode during the  
42 previous year. As county-level estimates of prevalence are not available from this data source and we  
43 are unaware of other reliable sources, the annual prevalence is assumed to be the same in all counties  
44 of a state.

45 *State prevalence of firearm-owning households*

46 RAND's Household Firearm Ownership Database(3) provides annual estimates of the proportion of  
47 adults who live in a household with firearms for each state in the US between 1980 and 2016. These  
48 estimates are based on direct measures of ownership from individual-level survey data and indirect  
49 proxy measures of ownership (for example, per capita hunting licenses, background checks, and  
50 subscriptions to *Guns & Ammo* magazine).

51 As the surveys were designed to be nationally representative but not for each state, multi-level  
52 regression with post-stratification was used to calculate subnational estimates(4) (A1). These  
53 corrected direct measures are then combined with indirect measures using a structural equation  
54 model which attempts to represent both direct and indirect measures as dependent in part on  
55 household ownership rates and in part on observed and unobserved confounders.

56 Additionally, as one of the indirect measures used by RAND (proportion of suicides that involved  
57 firearms) is collinear with the outcome of interest in this study, we re-estimated the firearm  
58 ownership rates with this measure excluded. Household firearm ownership rates were assumed to  
59 be homogenous across all counties in the state, a necessary simplification given annual county-level  
60 estimates of firearm ownership are unavailable.

#### 61 *Average weekly wage*

62 The Bureau of Labor Statistics through the Quarterly Census of Employment and Wages program(5)  
63 provides timely and finely-resolved estimates of wages from several industries covering over 95% of  
64 US jobs. These estimates are based on employer reports to the unemployment insurance contribution  
65 system and two annual surveys. Data are aggregated to industry sectors and geographic levels  
66 (metro, county, state, and national) and are available at annual frequency, with more frequent  
67 releases available at higher aggregations. Here, we use county-wise estimates of annual average  
68 weekly wage across all industries.

#### 69 *Unemployment rate*

70 The Bureau of Labor Statistics through the Labor and Unemployment Statistics (6) program provides  
71 estimates of unemployment by combining data from the Current Population Survey, the Current  
72 Employment Statistics survey, and state unemployment insurance systems. County-level rates  
73 incorporate methodological corrections to include agricultural workers, self-employed, unpaid  
74 family workers and private household workers who are not otherwise represented in  
75 administrative/survey datasets. These estimates are considered reliable and form the basis for  
76 budgetary allocations by federal, state and local governments.

#### 77 *Population Density*

78 Annual population density in each county was estimated using the intercensal and postcensal  
79 population estimates described above and the county land area per the 2010 US census(7). This  
80 calculation is not sensitive to changes in county boundaries during the study period. A log  
81 transformation was applied as the distribution was found to be non-normal.

82 The estimates for some of the county-level variables in a small percentage of counties (< 2%) were  
83 missing from the original data sources. We used the following 3-step process to impute missing  
84 values: (a) the mean of neighboring (defined in later sections) counties that have estimates; (b) if  
85 there are no neighbors with estimates, the median of all counties in the state for which estimates are

86 available; and (c) if estimates are missing for all counties in a state, the median across all counties in  
87 the US for which estimates are available.

88 Appendix Figure 1 shows pairwise Spearman correlation for each pair of covariates.

89 **Appendix Text 2: Conditional Autoregressive (CAR) Models**

90 Studies have previously used a wide array of regression and time series models to calculate effect  
 91 estimates of suicide risk factors and/or predict future trends (8). Methods that are solely temporal  
 92 (sARIMA, for example) do not capture the often critical spatial dependencies in suicides. Local spatial  
 93 models, such as geographically weighted regression, estimate regression coefficients for different  
 94 locations in space and have been used to understand spatial variations in regression relationship  
 95 between an outcome of interest and covariates(9, 10). Global models, such as the CAR, on the other  
 96 hand estimate a single set of global regression coefficients. The choice of CAR in this study is largely  
 97 driven by our research objective, as stated in the main text.

98 A CAR model under Poisson distribution assumption is specified as:

$$99 \quad y_{ct} \sim \text{Poisson}(\mu_{ct}\theta_{ct})$$

$$100 \quad \ln(\theta_{ct}) = \beta_0 + \mathbf{x}_{ct}^T \boldsymbol{\beta} + \psi_{ct}$$

$$101 \quad \boldsymbol{\beta} \sim N(\mu_{\boldsymbol{\beta}}, \boldsymbol{\Sigma}_{\boldsymbol{\beta}})$$

102 where  $y_{ct}$  denotes observed count of suicide deaths in county  $c$  during year  $t$ ,  $\mu_{ct}$  is the expected  
 103 suicide deaths in county  $c$  in year  $t$  and  $\theta_{ct}$  is the risk relative to  $\mu_{ct}$  (see Appendix Text 3).  $\mathbf{x}_{ct} =$   
 104  $(x_{ct1} \dots x_{ctp})$  is a vector of  $p$  covariates for county  $c$  during year  $t$ , with  $c = 1, \dots, C$  for the  $C$  counties  
 105 in the US and  $t = 1, \dots, N$ , for  $N$  years in the study period;  $\boldsymbol{\beta} = (\beta_1 \dots \beta_p)$  is the vector of covariate  
 106 regression parameters whose Gaussian prior is defined by mean  $\mu_{\boldsymbol{\beta}}$  and diagonal variance matrix  $\boldsymbol{\Sigma}_{\boldsymbol{\beta}}$ .  
 107  $\psi_{ct}$  a latent component encompassing one or more sets of spatiotemporally autocorrelated random  
 108 effects. The CAR-ANOVA(11) model decomposes spatiotemporal variation,  $\psi_{ct}$ , into an overall spatial  
 109 effect across the study period ( $\boldsymbol{\phi}$ ), an overall temporal trend over the study area ( $\boldsymbol{\delta}$ ), and a set of  
 110 independent space-time interactions ( $\boldsymbol{\gamma}$ );  $\boldsymbol{\phi} = (\phi_1 \dots \phi_C)$  and  $\boldsymbol{\delta} = (\delta_1 \dots \delta_N)$  are modeled by the  
 111 CAR prior proposed by Leroux and others (12).

$$112 \quad \psi_{ct} = \phi_c + \delta_t + \gamma_{ct}$$

$$113 \quad \gamma_{ct} \sim N(0, \tau_I^2)$$

$$114 \quad \phi_c | \phi_{-c}, \mathbf{W} \sim N\left(\frac{\rho_S \sum_{j=1}^C w_{cj} \phi_j}{\rho_S \sum_{j=1}^C w_{cj} + 1 - \rho_S}, \frac{\tau_S^2}{\rho_S \sum_{j=1}^C w_{cj} + 1 - \rho_S}\right)$$

$$115 \quad \delta_t | \delta_{-t}, \mathbf{D} \sim N\left(\frac{\rho_T \sum_{j=1}^N d_{tj} \delta_j}{\rho_T \sum_{j=1}^N d_{tj} + 1 - \rho_T}, \frac{\tau_T^2}{\rho_T \sum_{j=1}^N d_{tj} + 1 - \rho_T}\right)$$

$$116 \quad \tau_S^2, \tau_T^2, \tau_I^2 \sim \text{Inverse - Gamma}(a, b)$$

117  
118  
119  
120  
121  
122  
123  
124  
125  
126  
127  
128  
129  
130  
131  
132  
133  
134

$$\rho_S, \rho_T \sim \text{Uniform}(0, 1)$$

Here,  $\mathbf{W}$  is the  $C \times C$  spatial adjacency matrix, with  $w_{cd} = 1$  if counties  $c$  and  $d$  are adjacent to each other and 0 otherwise (counties are adjacent if they share at least one boundary point in the shape file; a county is not adjacent to itself). Analogously,  $\mathbf{D}$  is the  $N \times N$  temporal adjacency matrix, with  $d_{ij} = 1$  if  $|t - j| = 1$  (i.e. consecutive years) and 0 otherwise. Note that  $\mathbf{W}$  and  $\mathbf{D}$ , are independent of the outcome. The priors for the spatial ( $\tau_S^2$ ), temporal ( $\tau_T^2$ ) and space-time interaction ( $\tau_I^2$ ) random effects variances are specified by an Inverse-Gamma distribution with  $a=1$  and  $b=0.01$ ; spatial ( $\rho_S$ ) and temporal ( $\rho_T$ ) dependence parameters have uniform priors in the unit interval (1 indicates strong dependence; 0 independence). See appendix text 7 for sensitivity analysis on hyperparameters of the random effects variances.

The models were fit in a Bayesian setting using Markov chain Monte Carlo simulations. Parameters whose full conditional distributions have a closed form distribution are Gibbs sampled and the rest are updated using the Metropolis adjusted Langevin algorithm (13). For each model, three Markov chains each 110,000 in length with a burn-in of 10,000 were generated and a thinning factor of 1,000 was applied to remove correlation among the samples (14-16). Convergence was verified with the Geweke diagnostic statistic (17). Implementations of the methods are per CARBayesST package (18, 19) in R (20).



135 **Appendix Text 3: Reference model**

136 Let  $y_{ct}$  denote observed count of suicide deaths in county  $c$  during year  $t$ , and  $p_{ct}$  the corresponding  
137 population estimate. We assume the population can be split into  $k$  mutually exclusive and exhaustive  
138 strata, each with a different risk of suicide death; let  $y_{ctk}, p_{ctk}$  be the respective suicide deaths and  
139 population in strata  $k$ . The suicide risk for strata  $k$  nationally over the study period ( $t=1...n$ ) is  
140 calculated as:

141 
$$\eta_k = \frac{1}{n} \sum_{t=1}^n \left( \frac{\sum_c y_{ctk}}{\sum_c p_{ctk}} \right)$$

142 The expected number of deaths in county  $c$  during year  $t$  is calculated as:

143 
$$\mu_{ct} = \sum_k p_{ctk} * \eta_k$$

144 Drawing on prior studies on heterogeneity of suicide risk by age, race and gender, we use  $k = 72$   
145 strata of 9 age groups ([5, 15), [15, 25), ..., 85+), 4 racial groups (White, Black, American  
146 Indian/Alaskan Native, and Asian/Pacific Islander) and two gender groups. The race and gender  
147 categories are identical to those provided by the bridged-race population datasets.

148 ***Appendix Text 4. Variable selection for the CAR model***

149 To identify variables with marginal contribution to model quality, we built an exhaustive set of  
150 Poisson generalized linear models with the expected deaths (as described above in appendix text 3)  
151 as offset and all possible combinations of the 7 risk factors as explanatory variables. Specifically, we  
152 built 127 models ( $2^7 - 1$ ), where in each model the observed deaths was the dependent variable and  
153 one combination of the risk factors were explanatory variables. We calculated goodness of-fit metric  
154 (Akaike Information Criterion (AIC)) for each model and compared these to the AIC of the *full* model,  
155 the model built using all available predictors. The figure below shows the difference in AIC of each  
156 model relative to the AIC of the *full* model for the best 30 models. Also shown in the figure are two  
157 additional goodness-of-fit metrics, demonstrating that the relative ranking of models was largely  
158 insensitive to the metric used.

159 Based on the AIC, we identified the best 6-, 5-, 4- and 3- predictor models to assess the tradeoff  
160 between model parsimony and model fit quality. We chose to use the best 5-predictor model (which  
161 excluded unemployment rate and the prevalence of major depressive disorder) as the *select* model,  
162 as it offered the possibility of dropping two variable with a slight (.07%) degradation in AIC

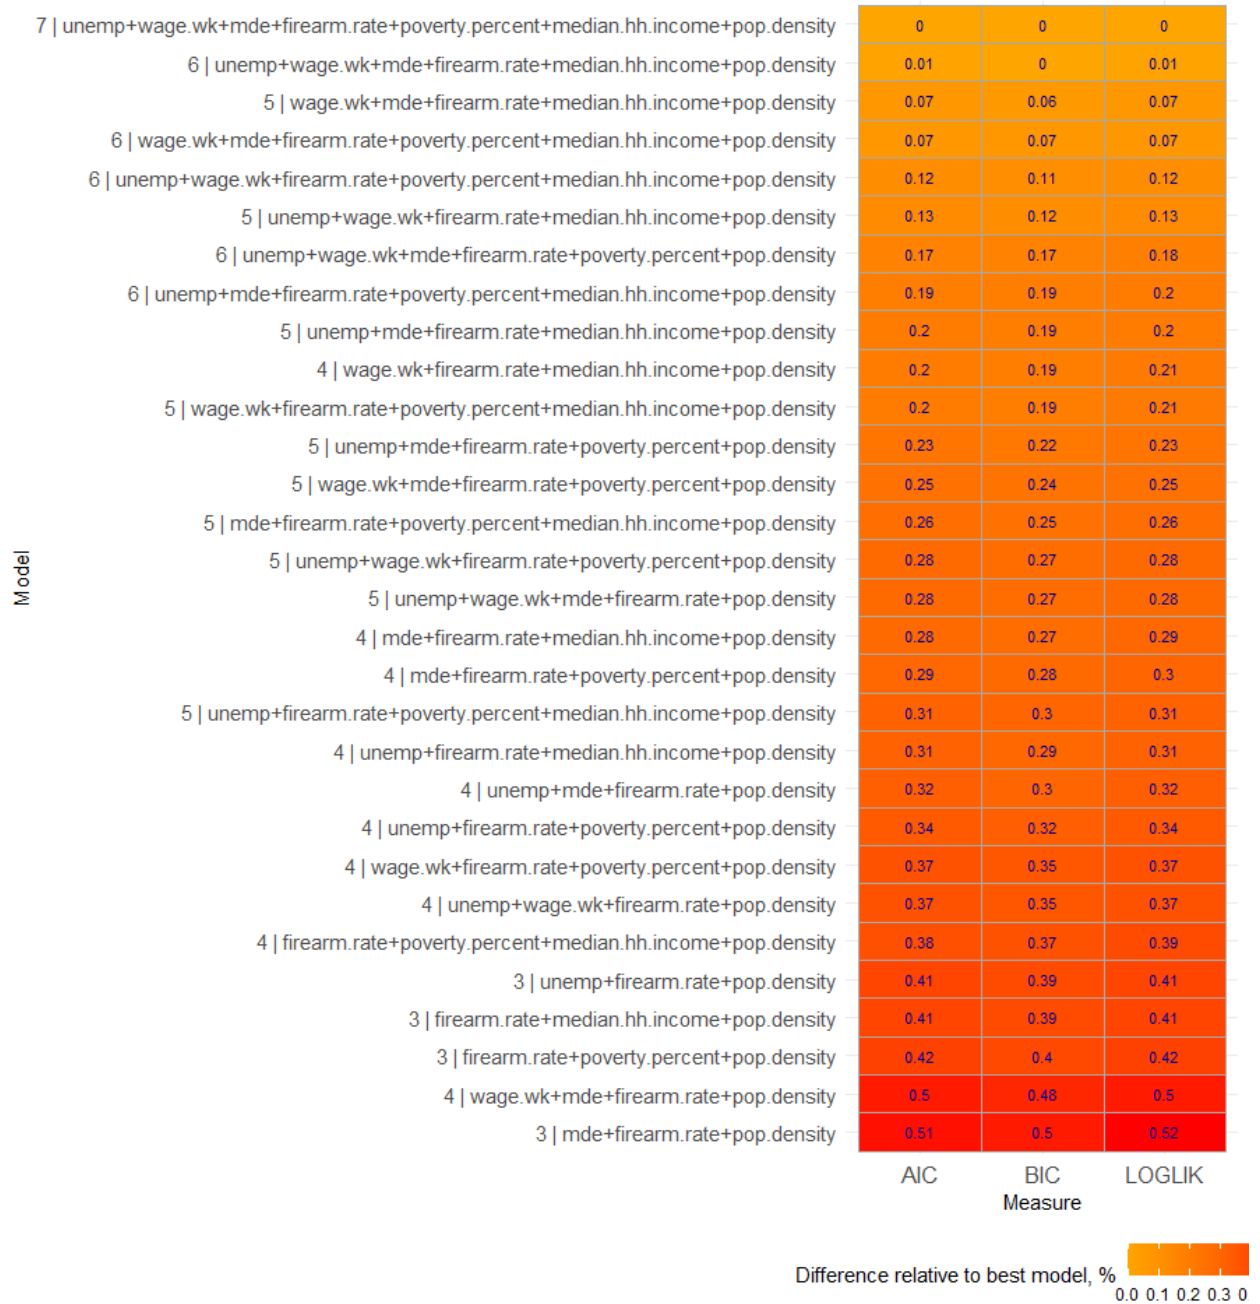

**Figure T4F1:** Goodness-of-fit metrics for different combinations of covariates. The full model using all 7 covariates had the best fit, and the difference (%) of all other models relative to the full model is shown for the top 30 models (per AIC).

163 ***Appendix Text 5: Isolated counties and counties with no recorded deaths***

164 Of the 3142 counties in the US, 5 counties (Honolulu, HI; Kauai, HI; Hawaii, HI; Nantucket, MA; and  
165 San Juan WA) have no known neighbors in the shape file. As the CAR model specification requires  
166 each location to have at least one neighbor, these counties were excluded from the analysis.  
167 Additionally, two counties (Wade Hampton, AK and Shannon, SD) that had no outcome data were  
168 also excluded.

169 There were also a sizeable number of counties with no recorded deaths during a year. Over the 12-  
170 year study period, a total of 4979 county-year instances (13.2% of total) had zero suicide death  
171 counts, with the yearly percentages decreasing from 15.2% in 2005 to 10.6% in 2016. While the CAR  
172 models do not require any remediation for these instances, when the observed outcome is 0, the  
173 symmetric proportion error takes the maximum possible penalty of 1, thus considerably inflating the  
174 aggregate mean errors. As we are unaware of a consensus on how to handle these zero-count cases,  
175 we retained these counties while calculating the errors in the main text. Appendix Figure 7 shows the  
176 errors with these county-year instances excluded. Dropping these county-year pairs does not change  
177 the improvement in errors of all CAR-ANOVA models relative to the *reference* model.

178 **Appendix Text 6. CAR model with only county-level covariates**

179 Prior to building CAR models we built Poisson log-linear models and compared goodness-of-fit from  
180 all combination of covariates. This was done in part to avoid having to build a large number of  
181 computationally expensive CAR models, for identifying a good set of covariates. With these simpler  
182 models, we found that despite the strong assumption of intra-state homogeneity, both firearm  
183 ownership rate and prevalence of major depressive disorder were highly informative, and their non-  
184 inclusion considerably degraded AIC. In fact, the 5-covariate model that did not include these two  
185 variables underperformed (higher AIC) most 4-, and 3-covariate models and the univariate model  
186 with just the firearm ownership rates.

187 We have additionally built a CAR-ANOVA model using only county-level covariates. Effect estimates  
188 are shown in table below (appendix table T6T1). In the in-sample setting, the goodness-of-fit  
189 measure (WAIC) of this model (*select.ct*) was nearly identically to that of the *full* model and worse  
190 than that of the *select* model. Using the paired Wilcoxon signed rank test (appendix figure T6F1),  
191 errors were found to be not statistically significantly different from those of the *select* model, but  
192 lower than those of the *full* model. The model outperformed the *null* model by both WAIC and errors.

193 To summarize, the inclusion of these two variables in the CAR models *full* and *select*, under the  
194 assumption of intra-state homogeneity, did not unambiguously degrade model fit or errors. As an  
195 aside, the relative value of the covariates as assessed with log-linear models did not appear to  
196 translate to CAR models, possibly suggesting the strong effect of spatiotemporal autocorrelation  
197 compared to the effect of one or more of the considered covariates.

| Variable           | Mean Estimate | 95% CI       |
|--------------------|---------------|--------------|
| Median HH income   | -5.189        | -6.38, -4.03 |
| Population density | -0.022        | -0.03, -0.01 |
| Poverty, %         | -0.519        | -0.72, -0.31 |
| Unemployment, %    | 0.890         | 0.54, 1.22   |
| Weekly wage        | 0.008         | -0.05, 0.07  |
| rho.S              | 0.980         | 0.96, 0.99   |
| rho.T              | 0.911         | 0.62, 0.99   |
| tau2.I             | 0.003         | 0.002, 0.004 |
| tau2.S             | 0.099         | 0.092, 0.108 |
| tau2.T             | 0.003         | 0.002, 0.008 |
| WAIC               | 161249        |              |

**Table T6T1:** Effect estimates for suicide mortality risk for one standard deviation change in predictor, using five county-level models.

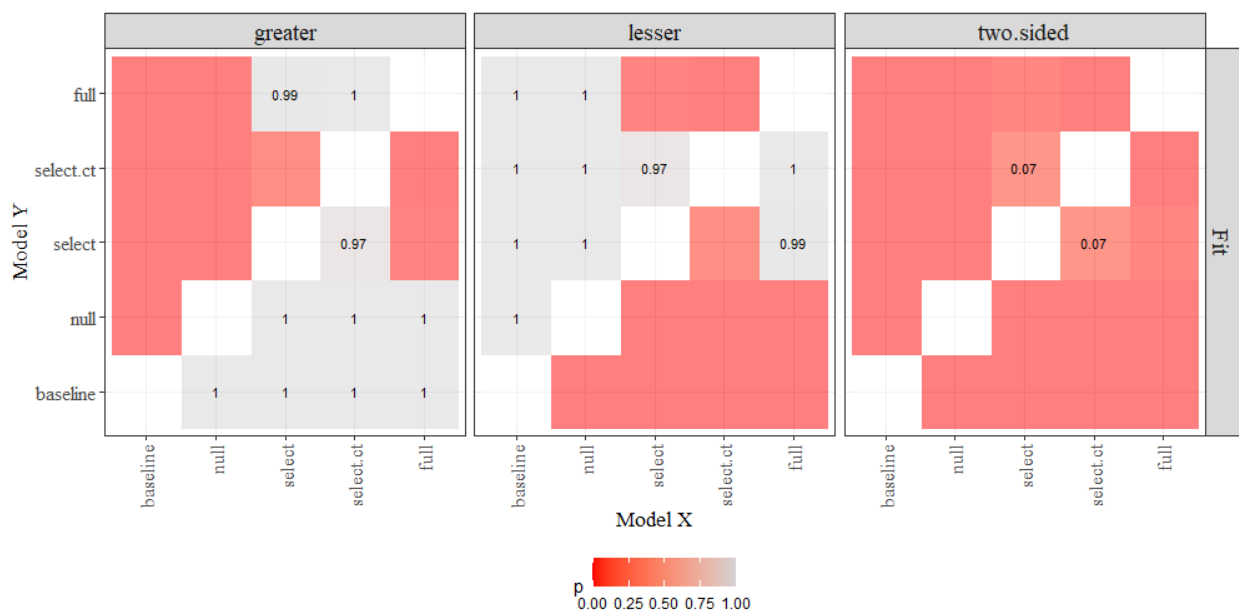

**Figure T6F1:** Wilcoxon signed rank test for each pair of models, as in Figure 2 of the main text, and now including CAR model (*select.ct*) built with only county-level variables. Significance ( $p < .05$ ) in the 'two.sided' column indicates that the difference in errors of Model X and Model Y is not symmetric around 0.  $p < .05$  in the 'lesser' panel column indicates errors in Model X ( $x$ -axis) are lower than Model Y. Actual  $p$ -value are shown as text when errors are not significantly different.

199 **Appendix Text 7. Sensitivity analysis of Inverse-Gamma shape and scale hyperparameters**

200 As described in section 2, the priors for the random effects variances ( $\tau_S^2$ ,  $\tau_T^2$  and  $\tau_I^2$ ) were defined by  
 201 an Inverse-Gamma distribution with  $shape=1$  and  $scale=0.01$ . To assess the sensitivity of the CAR  
 202 model results to these priors, we built additional models with  $shape = \{0.75, 1, 1.25\}$  and  $scale =$   
 203  $\{0.005, 0.01, 0.02\}$ , and same covariates as the *select* model.

204 Figure T7F1 plots the stanardized effect estimates for each of these 9 models, demonstrating no large  
 205 changes. Figures T7F2 shows that there are differences in error among the 9 models, but overall have  
 206 lower error than of the *full* model, as reported in the main results. Higher *scale* values appear to yield  
 207 lower errors for the same *shape* and the difference is statistically significant.

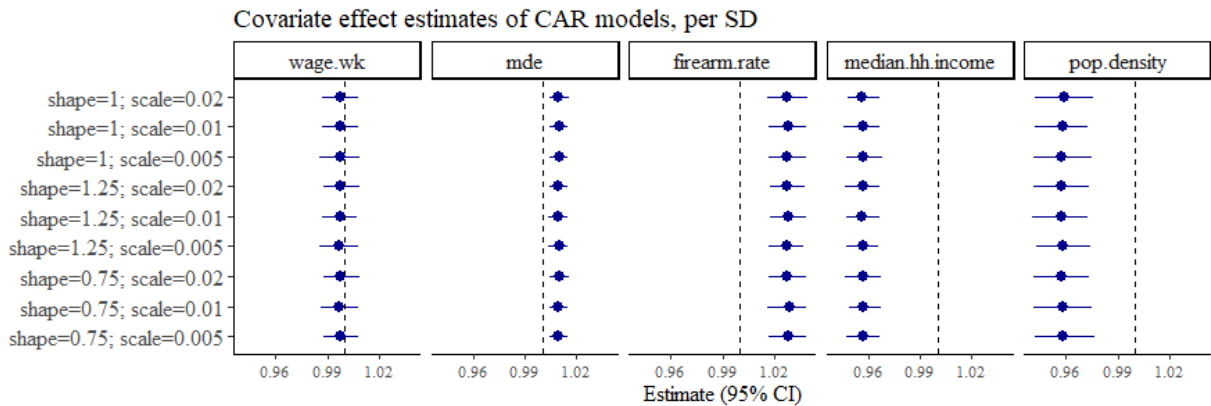

**Figure T7F1:** Standardized effect estimates for suicide mortality risk for the select CAR model, with 9 pairs of hyperparameters.

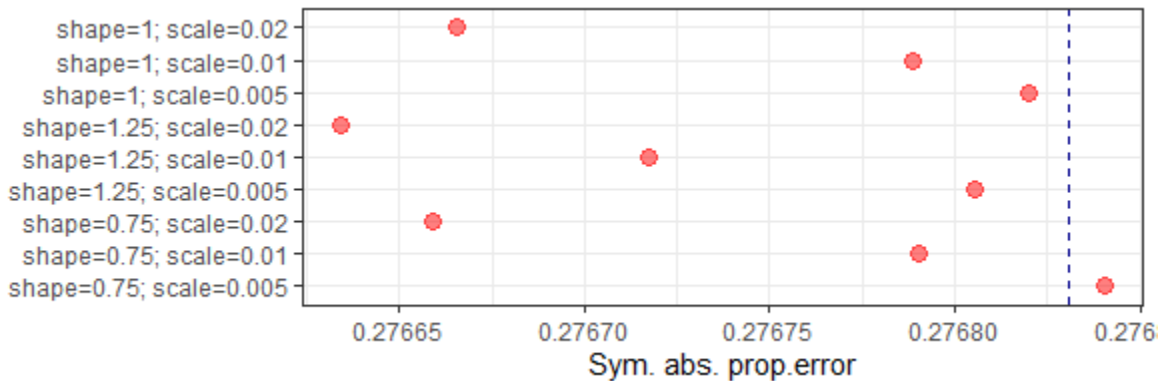

**Figure T7F2:** Symmetric absolute proportion error for the 9 models. Blue vertical represents error with the *full* model

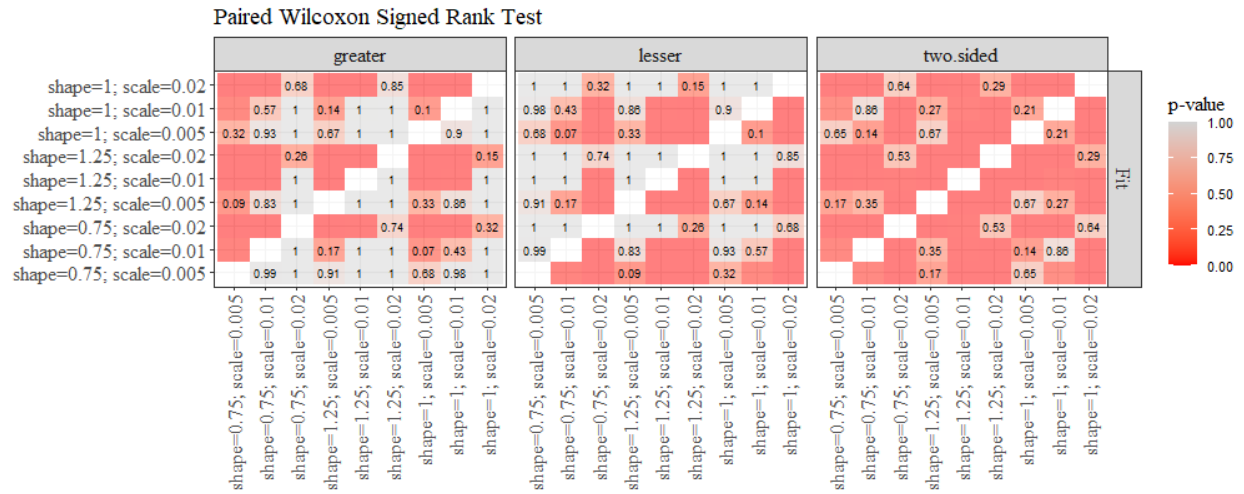

Figure T7F3: Wilcoxon signed rank test for significant differences in the errors.



| <b>Variable</b>     | <b>Select</b>         | <b>Full</b>           |
|---------------------|-----------------------|-----------------------|
| Firearm ownership   | 1.0283 (1.018, 1.039) | 1.03 (1.02, 1.041)    |
| Major Depression, % | 1.0099 (1.004, 1.015) | 1.0102 (1.005, 1.016) |
| Median HH income    | 0.9575 (0.949, 0.968) | 0.9413 (0.928, 0.955) |
| Population density  | 0.9574 (0.942, 0.975) | 0.9629 (0.946, 0.98)  |
| Poverty, %          | NA                    | 0.9664 (0.954, 0.98)  |
| Unemployment, %     | NA                    | 1.028 (1.019, 1.038)  |
| Weekly wage         | 0.997 (0.987, 1.007)  | 1.0017 (0.992, 1.013) |

**Appendix Table 1.** Effect estimates for suicide mortality risk for one standard deviation change in predictor.

| <b>Variable</b>     | <b>Mean Estimate</b> | <b>95% CI</b> |
|---------------------|----------------------|---------------|
| Firearm ownership   | 0.246                | 0.16, 0.34    |
| Major Depression, % | 1.455                | 0.56, 2.19    |
| Median HH income    | -3.681               | -4.42, -2.78  |
| Population density  | -0.024               | -0.03, -0.02  |
| Weekly wage         | -0.019               | -0.08, 0.04   |
| rho.S               | 0.973                | 0.94, 0.99    |
| rho.T               | 0.911                | 0.61, 0.99    |
| tau2.I              | 0.003                | 0.002, 0.004  |
| tau2.S              | 0.099                | 0.091, 0.108  |
| tau2.T              | 0.003                | 0.001, 0.007  |
| WAIC                | 161235               |               |

a. *Select model*

| <b>Variable</b>     | <b>Mean Estimate</b> | <b>95% CI</b> |
|---------------------|----------------------|---------------|
| Firearm ownership   | 0.262                | 0.18, 0.36    |
| Major Depression, % | 1.500                | 0.73, 2.31    |
| Median HH income    | -5.149               | -6.37, -3.96  |
| Population density  | -0.022               | -0.03, -0.01  |
| Poverty, %          | -0.533               | -0.74, -0.34  |
| Unemployment, %     | 0.954                | 0.66, 1.27    |
| Weekly wage         | 0.011                | -0.05, 0.08   |
| rho.S               | 0.975                | 0.94, 0.99    |
| rho.T               | 0.914                | 0.61, 0.99    |
| tau2.I              | 0.003                | 0.002, 0.004  |
| tau2.S              | 0.096                | 0.088, 0.104  |
| tau2.T              | 0.003                | 0.002, 0.008  |
| WAIC                | 161250               |               |

b. *Full model*

| <b>Variable</b> | <b>Mean Estimate</b> | <b>95% CI</b> |
|-----------------|----------------------|---------------|
| rho.S           | 0.982                | 0.958, 0.995  |
| rho.T           | 0.893                | 0.572, 0.987  |
| tau2.I          | 0.003                | 0.002, 0.004  |
| tau2.S          | 0.120                | 0.111, 0.129  |
| tau2.T          | 0.002                | 0.001, 0.006  |
| WAIC            | 161267               |               |

c. *null model*

**Appendix Table 2.** Effect estimates in suicide mortality risk for one *unit change* in predictor, and spatial and temporal dependence parameters. WAIC: Watanabe-Akaike Information Criterion

**Chain 1:** WAIC= 161229;DIC = 161100; p.d. = 2613; LMPL = -80634

|                     | Median  | 2.5%    | 97.5%   | n.effective | Geweke.diag |
|---------------------|---------|---------|---------|-------------|-------------|
| (Intercept)         | 0.1505  | 0.0683  | 0.2427  | 100         | -0.2        |
| Weekly wage         | -0.0189 | -0.0818 | 0.045   | 100         | -0.6        |
| Median HH income    | -3.5928 | -4.4867 | -2.6009 | 100         | 0.9         |
| Major depression, % | 1.4582  | 0.5275  | 2.1948  | 100         | 0.1         |
| Firearm ownership   | 0.2369  | 0.1578  | 0.3238  | 149         | 0.9         |
| Population density  | -0.0252 | -0.0323 | -0.0154 | 73.6        | -0.9        |
| tau2.S              | 0.0991  | 0.0909  | 0.1081  | 100         | 0.5         |
| tau2.T              | 0.0031  | 0.0012  | 0.0069  | 100         | -0.7        |
| tau2.I              | 0.0029  | 0.0022  | 0.0037  | 23          | 0.7         |
| rho.S               | 0.9737  | 0.9466  | 0.9912  | 100         | -0.3        |
| rho.T               | 0.8983  | 0.5141  | 0.9902  | 100         | 0.6         |

**Chain 2:** WAIC= 161239; DIC = 161107; p.d. = 2619; LMPL = -80641

|                     | Median  | 2.5%    | 97.5%   | n.effective | Geweke.diag |
|---------------------|---------|---------|---------|-------------|-------------|
| (Intercept)         | 0.1447  | 0.0804  | 0.2158  | 100         | -1.9        |
| Weekly wage         | -0.0166 | -0.084  | 0.0357  | 100         | -0.8        |
| Median HH income    | -3.7457 | -4.4904 | -2.7739 | 100         | 1.5         |
| Major depression, % | 1.5112  | 0.6544  | 2.263   | 100         | -0.7        |
| Firearm ownership   | 0.2527  | 0.1689  | 0.3581  | 100         | 1.3         |
| Population density  | -0.0244 | -0.0331 | -0.0162 | 100         | 2.6         |
| tau2.S              | 0.0989  | 0.0913  | 0.108   | 100         | 2.1         |
| tau2.T              | 0.0025  | 0.0013  | 0.0074  | 100         | -0.1        |
| tau2.I              | 0.003   | 0.0024  | 0.0037  | 49.2        | 1.1         |
| rho.S               | 0.974   | 0.9379  | 0.9915  | 70.2        | 1.7         |
| rho.T               | 0.9192  | 0.74    | 0.994   | 100         | 1.3         |

**Chain 3:** WAIC= 161239;DIC = 161115; p.d. = 2633; LMPL = -80645

|                     | Median  | 2.50%   | 97.50%  | n.effective | Geweke.diag |
|---------------------|---------|---------|---------|-------------|-------------|
| (Intercept)         | 0.1534  | 0.0652  | 0.246   | 584         | 0.3         |
| Weekly wage         | -0.0203 | -0.0793 | 0.0409  | 100         | -0.4        |
| Median HH income    | -3.7046 | -4.2836 | -2.9766 | 100         | 0.8         |
| Major depression, % | 1.3949  | 0.4921  | 2.1189  | 100         | -1.1        |
| Firearm ownership   | 0.248   | 0.1489  | 0.3352  | 100         | 0.5         |
| Population density  | -0.0239 | -0.0358 | -0.0138 | 100         | -0.3        |
| tau2.S              | 0.0986  | 0.0903  | 0.1081  | 100         | 0.9         |
| tau2.T              | 0.0029  | 0.0014  | 0.0065  | 100         | 0.4         |
| tau2.I              | 0.003   | 0.0023  | 0.0037  | 50.3        | 0.6         |
| rho.S               | 0.9712  | 0.9425  | 0.9902  | 100         | -2.5        |
| rho.T               | 0.9146  | 0.588   | 0.9899  | 100         | -0.1        |

*Gelman-Rubin Diagnostic:* 1.02

**Appendix Table 3:** Output from the *select* model over the fit period from three chains; showing mean and 95% credible interval; effective number of independent samples and diagnostics. Geweke diagnostic between [-2, 2] indicates model convergence and Gelman-Rubin statistic under 1.1 indicates that longer chains are not necessary. *WAIC:* Watanabe-Akaike Information Criterion *DIC:* deviance information criteria; *p.d.:* effective number of parameters; *LMPL:* Log Marginal Predictive Likelihood.

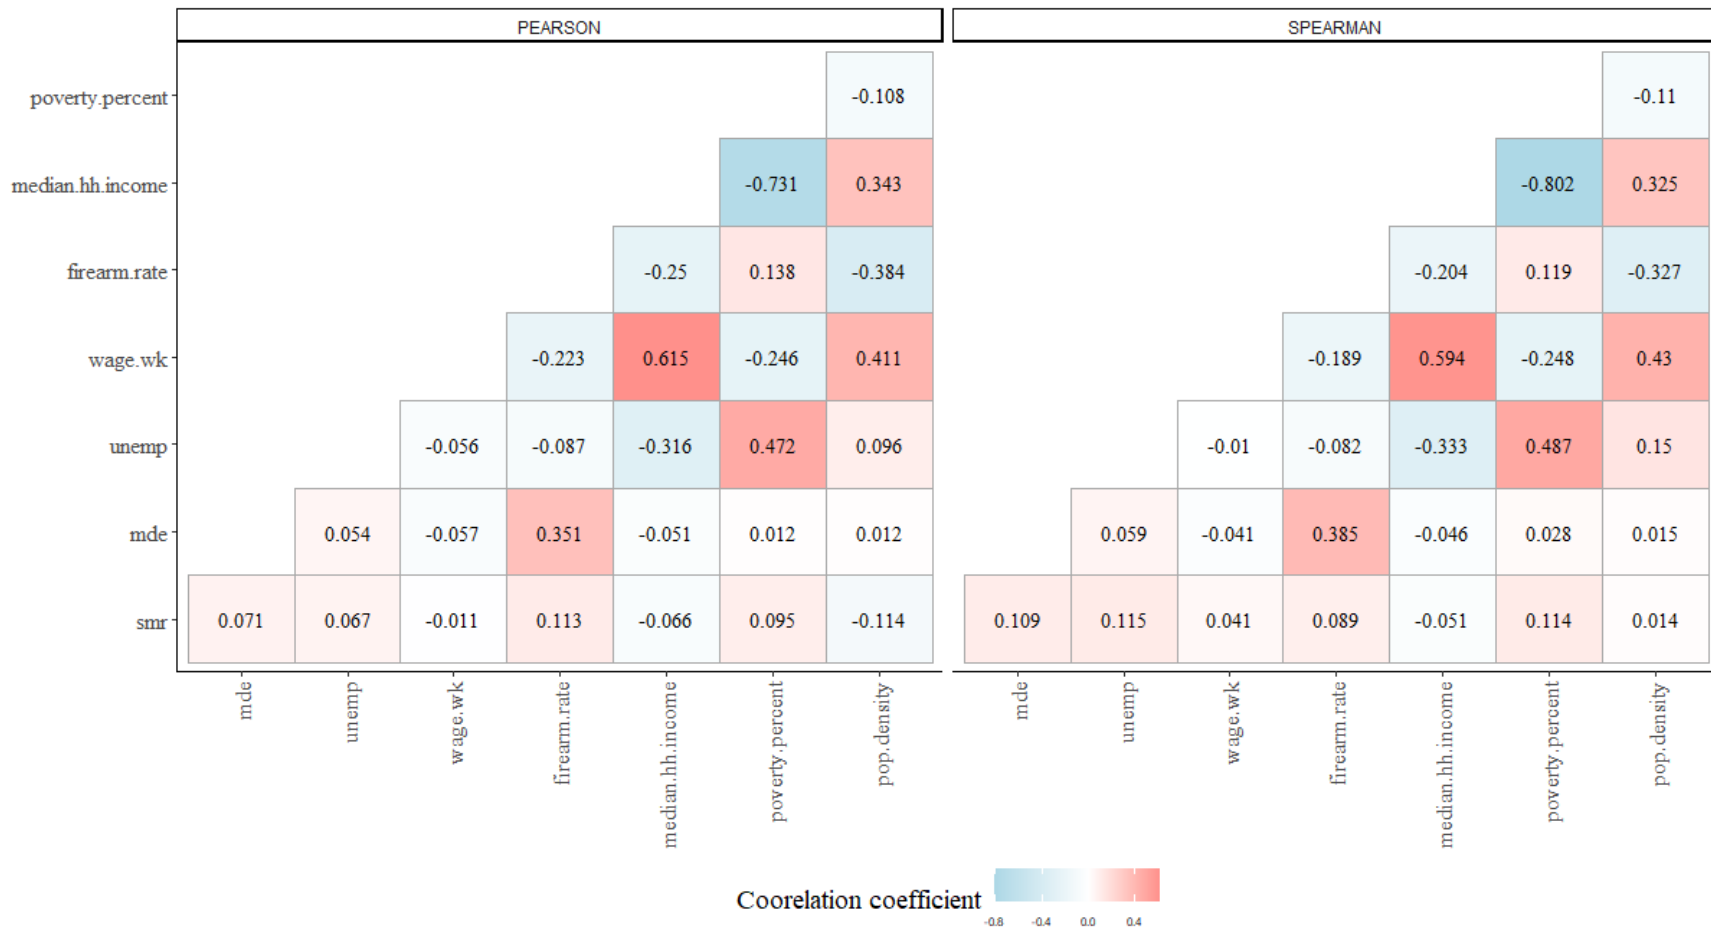

**Appendix Figure 1.** Pearson and Spearman correlation coefficient for variables used. *smr* = standardized mortality rate; *mde*: major depressive episode; *unemp*: unemployment rate; *wage.wk*: weekly wage; *median.hh.income*: median household income

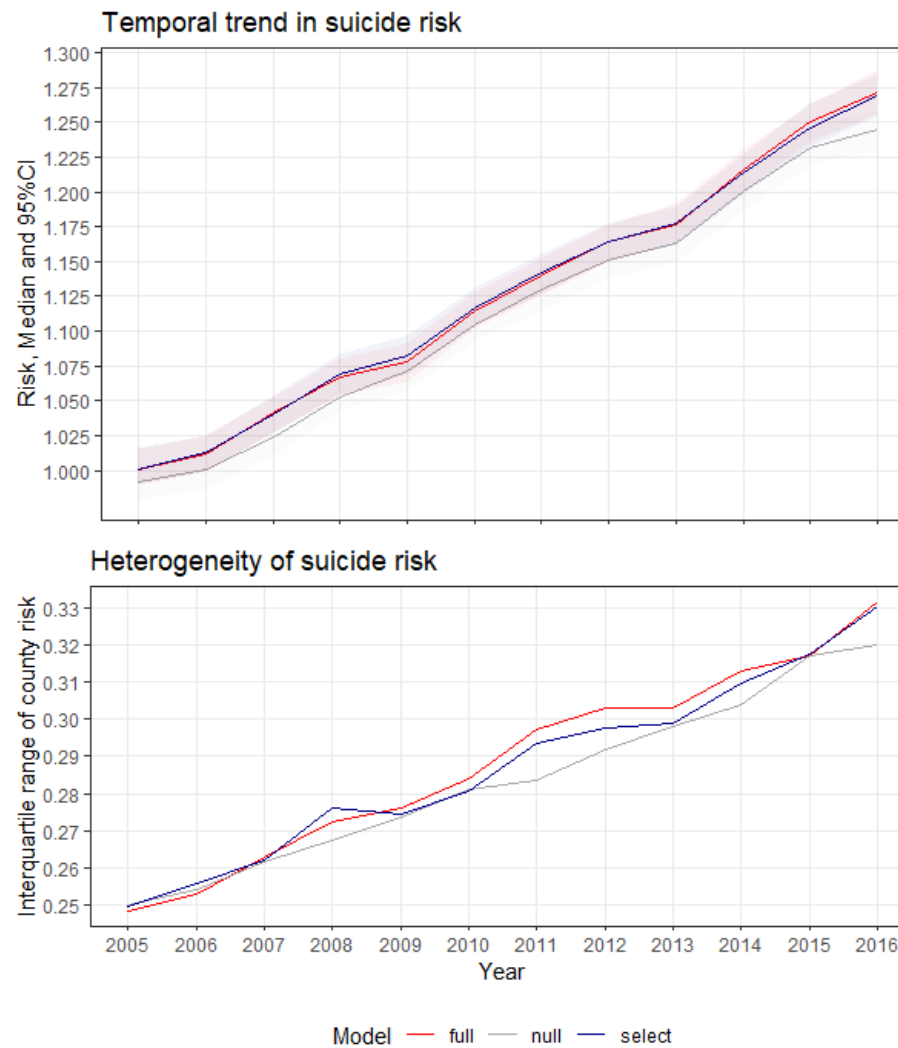

**Appendix Figure 2.** a) Median and 95% CI for national suicide risk for the three CAR models (risks from *select* and *full* models are similar and not distinguishable). B) Interquartile (IQR) range of county-level risk for the same models.

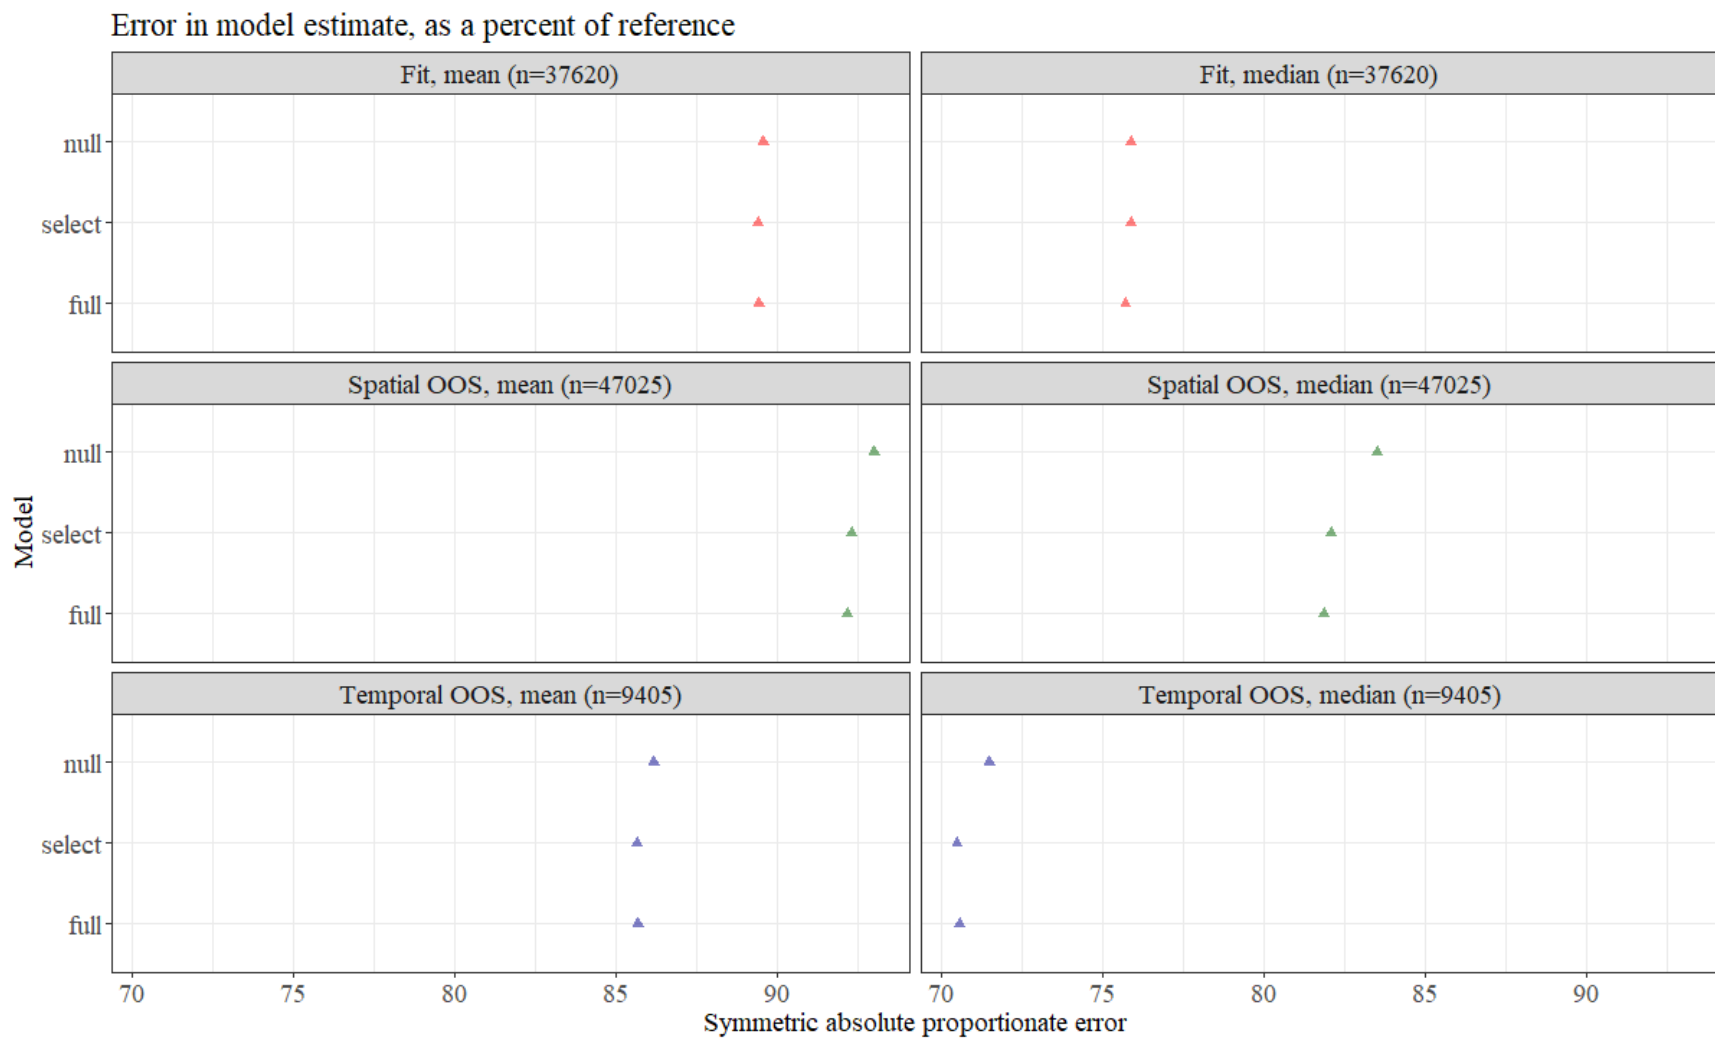

**Appendix Figure 3.** Mean and Median symmetric proportional error for in-sample, temporal out-of-sample and spatial out-of-sample estimates for the three CAR models, as a percent of error in *baseline*. Baseline estimates are expected deaths from population profile,  $\mu_{ct}$ .

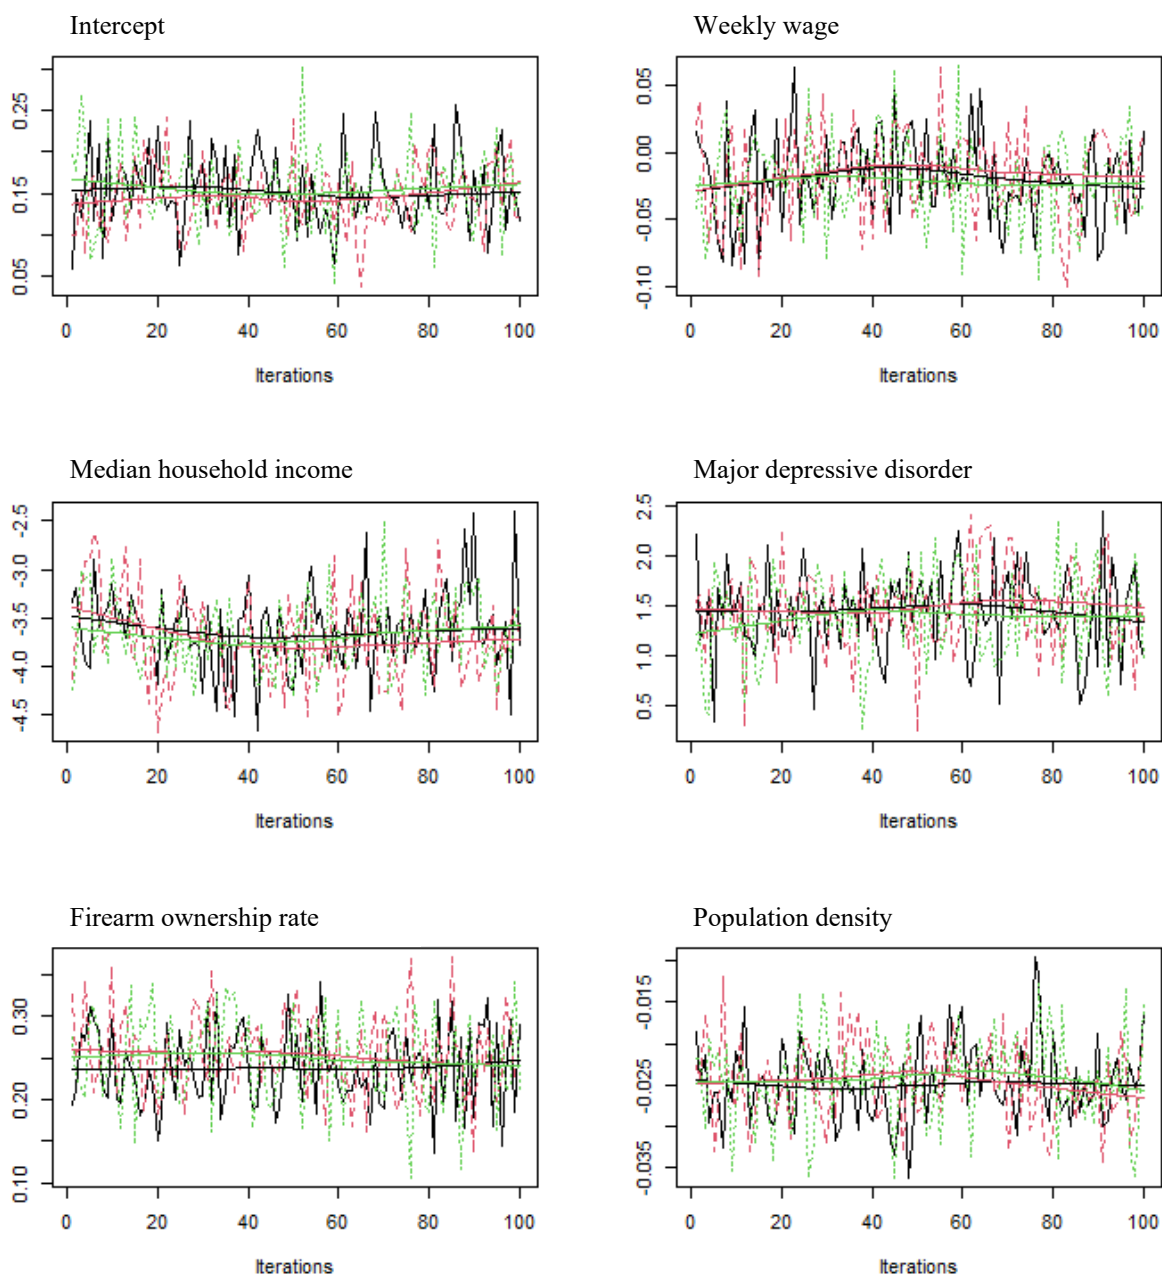

**Appendix Figure 4.** Trace plots for the intercept and five regression parameters in the *select* model over the fit period, for three chains (black, red, green), showing no clear trend in mean or variance, suggestive of chain convergence.

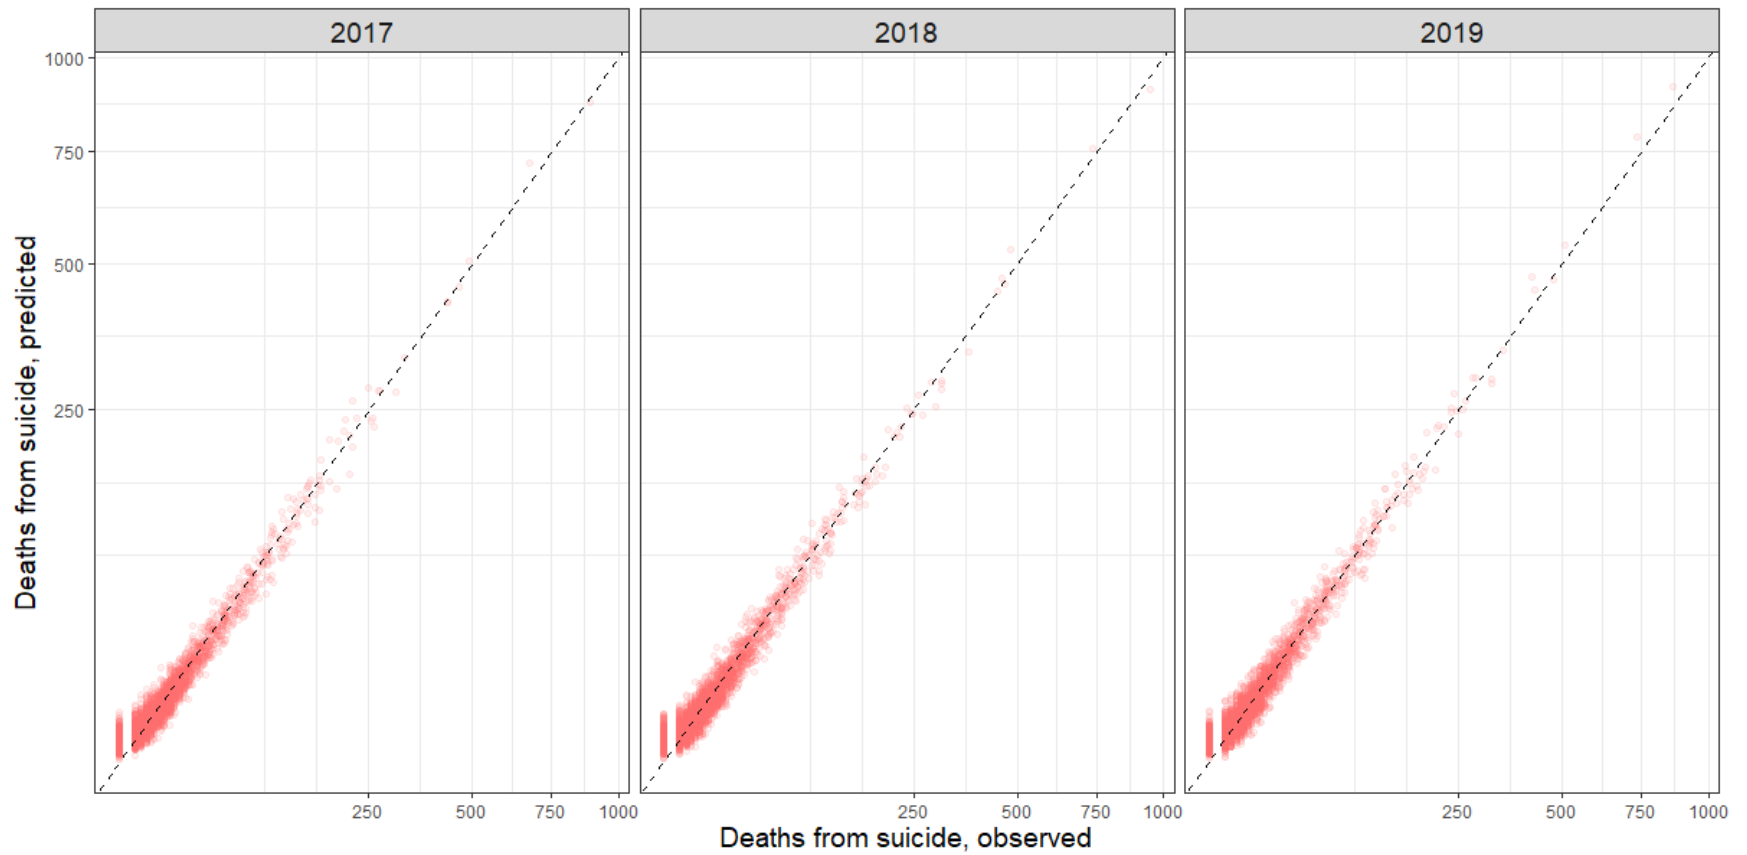

**Appendix Figure 5.** Scatter plot of model estimates of suicide deaths from *select* model in temporal OOS setting. Each data point represents a county. Axes are square root transformed.



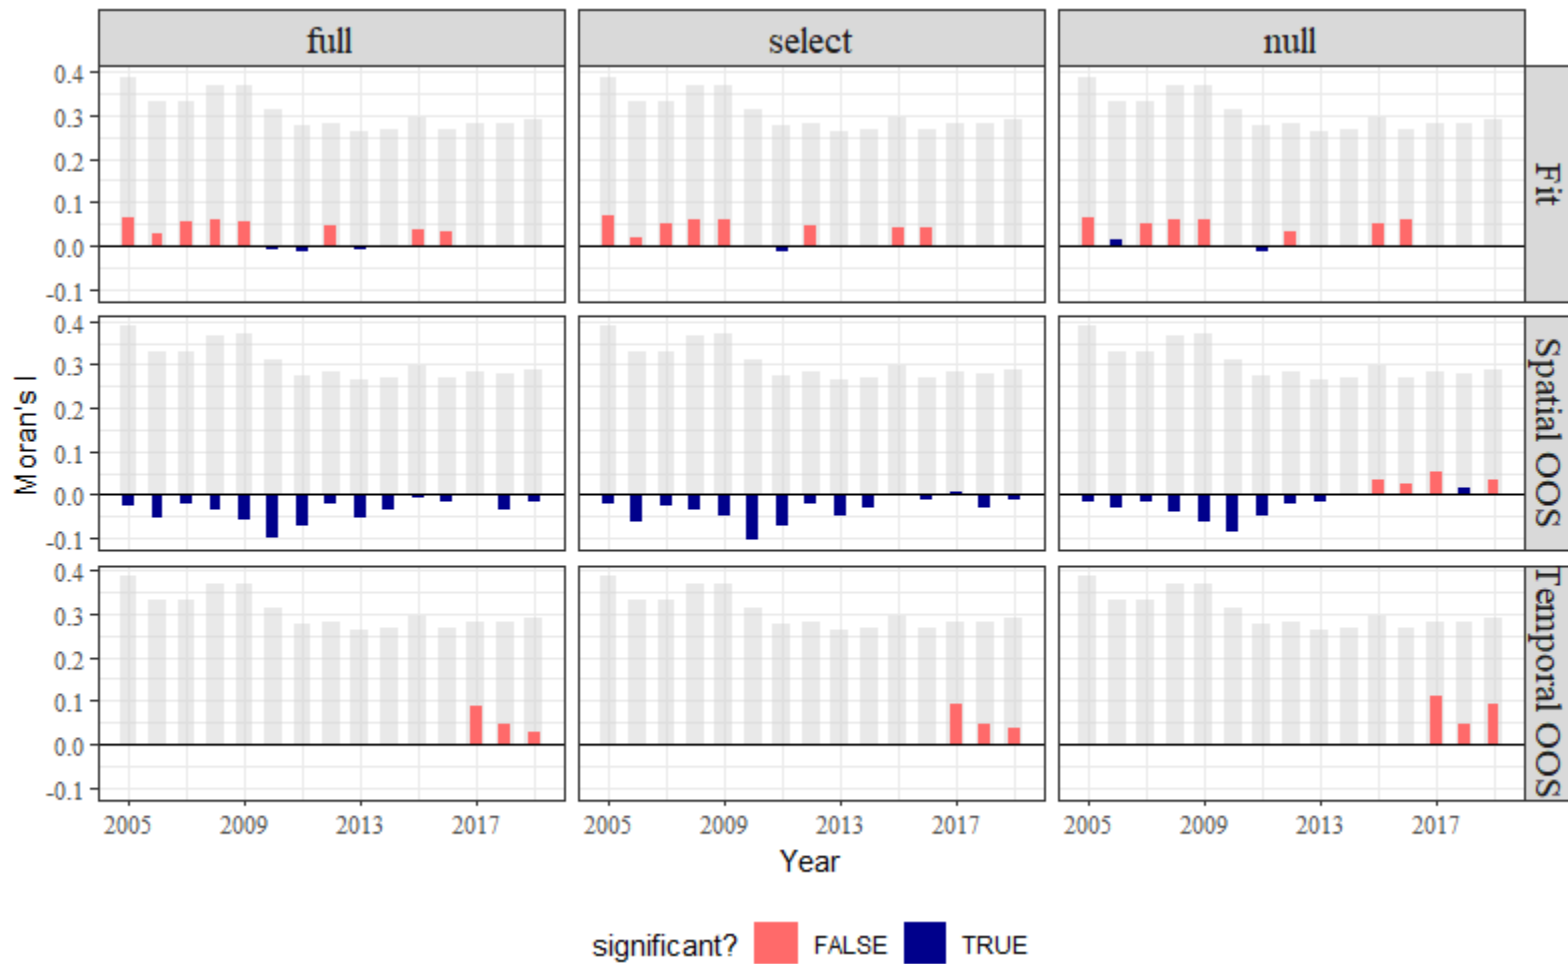

**Appendix Figure 6.** Global Moran' I in the residual. Magnitude of Moran's I statistic is indicated by the bars, with color indicating significance. The grey bars shows corresponding Moran's I from the *baseline* model (all significant).

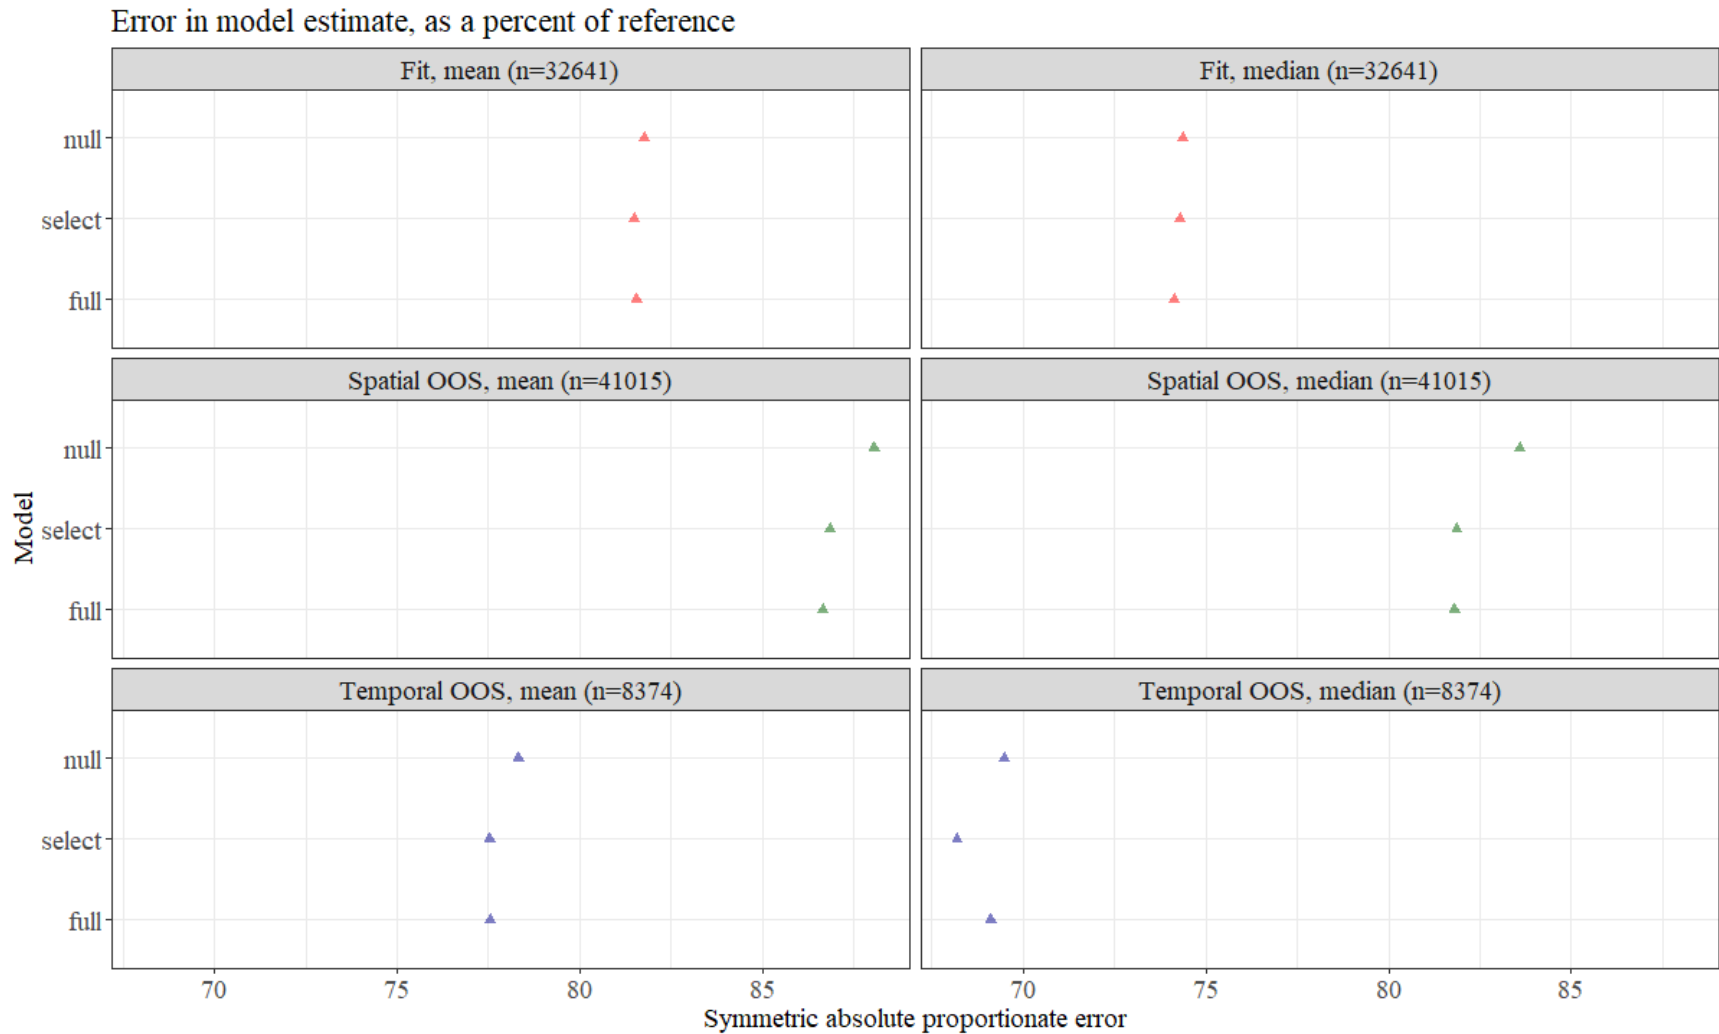

**Appendix Figure 7.** Mean and Median symmetric proportional error for in-sample, temporal out-of-sample and spatial out-of-sample estimates for all attempted model forms, as a percent of error in baseline estimates, *with zero-count county-year instances excluded.*

## References

1. US\_Census\_Bureau. Small Area Income and Poverty Estimates2020; (September 1, 2021). Available from: <https://www.census.gov/data/datasets/2020/demo/saipe/2020-state-and-county.html>.
2. 1999 to 2019 National Surveys on Drug Use and Health (NSDUHs) small area estimation dataset: State small area estimates, by survey year, outcome, state, and age group, NSDUH methodological report [Internet]. Substance Abuse and Mental Health Services Administration. . 2021.
3. Schell TL, Peterson S, Vegetabile BG, Scherling A, Smart R, Morral AR. State-level estimates of household firearm ownership: RAND Santa Monica, CA; 2020.
4. Gelman A, Little TC. Poststratification into many categories using hierarchical logistic regression. 1997.
5. Bureau\_of\_Labor\_Statistics. Quarterly Census of Employment and Wages 2020 9/12/2021; (September 1, 2021). Available from: <https://www.bls.gov/cew/downloadable-data-files.htm>.
6. Bureau\_of\_Labor\_Statistics. Local Area Unemployment Statistics2020 9/12/2021. Available from: <https://www.bls.gov/lau/lauov.htm>.
7. US\_Census\_Bureau. Cartographic Boundary Files - Shapefile2018; (1/11/2021). Available from: <https://www.census.gov/geographies/mapping-files/time-series/geo/carto-boundary-file.html>.
8. Belsher BE, Smolenski DJ, Pruitt LD, Bush NE, Beech EH, Workman DE, et al. Prediction models for suicide attempts and deaths: a systematic review and simulation. JAMA Psychiatry. 2019;76(6):642-51.
9. Tran F, Morrison C. Income inequality and suicide in the United States: a spatial analysis of 1684 US counties using geographically weighted regression. Spatial Spatio-temporal Epidemiology 2020;34:100359.
10. Wheeler DC, Páez A. Geographically weighted regression. Handbook of applied spatial analysis: Springer; 2010. p. 461-86.
11. Knorr-Held L. Bayesian modelling of inseparable space-time variation in disease risk. Statistics in medicine. 2000;19(17-18):2555-67.
12. Leroux BG, Lei X, Breslow N. Estimation of disease rates in small areas: a new mixed model for spatial dependence. Statistical models in epidemiology, the environment, and clinical trials: Springer; 2000. p. 179-91.
13. Roberts GO, Rosenthal JS. Optimal scaling of discrete approximations to Langevin diffusions. Journal of the Royal Statistical Society: Series B. 1998;60(1):255-68.
14. Gelman A, Carlin JB, Stern HS, Dunson DB, Vehtari A, Rubin DB. Bayesian Data Analysis: CRC Press; 2013.
15. Rue H, Held L. Gaussian Markov random fields: theory and applications: CRC press; 2005.
16. Gerber F, Furrer R. Pitfalls in the implementation of Bayesian hierarchical modeling of areal count data: An illustration using BYM and Leroux models. Journal of Statistical Software. 2015;63(1):1-32.
17. Geweke JF. Evaluating the accuracy of sampling-based approaches to the calculation of posterior moments. Federal Reserve Bank of Minneapolis; 1991.
18. Lee D. A tutorial on spatio-temporal disease risk modelling in R using Markov chain Monte Carlo simulation and the CARBayesST package. Spatial and Spatio-temporal Epidemiology. 2020;34:100353.
19. Lee D, Rushworth A, Napier G. Spatio-temporal areal unit modeling in R with conditional autoregressive priors using the CARBayesST package. Journal of Statistical Software. 2018;84(1):1-39.
20. Team RC. R: A language environment for statistical computing. R Foundation for Statistical Computing; version 3.5. 0. 2018.
